# Supplementary material for: Cold Atmospheric Plasma Induces ATP-Dependent Endocytosis of Nanoparticles and Synergistic U373MG Cancer Cell Death
Source: PubMed Central journal article supplement (PMC5871835; doi:10.1038/s41598-018-23262-0), 2018-03-28
Supplement: 41598_2018_23262_MOESM1_ESM.pdf [file 41598_2018_23262_MOESM1_ESM.pdf]

**TITLE:**

*Supplementary Information:*

**Cold Atmospheric Plasma Induces ATP-  
Dependent Endocytosis of Nanoparticles and  
Synergistic U373MG Cancer Cell Death**

**AUTHORS AND AFFILIATIONS:**

Zhonglei He<sup>1,2</sup>, Kangze Liu<sup>1,2\*</sup>, Eline Manaloto<sup>1,2\*</sup>, Alan Casey<sup>2</sup>, George Paul Cribaro<sup>4</sup>, Hugh J. Byrne<sup>2</sup>, Furong Tian<sup>1,2,3</sup>, Carlos Barcia<sup>4</sup>, Gillian E. Conway<sup>1,2</sup>, Patrick J Cullen<sup>1,5</sup>, and James F. Curtin<sup>1,2,3</sup>

<sup>1</sup>BioPlasma Research Group, School of Food Science and Environmental Health, Dublin Institute of Technology, Dublin, Ireland; <sup>2</sup>Nanolab, FOCAS Research Institute, Dublin Institute of Technology, Dublin, Ireland; and <sup>3</sup>Environmental, Sustainability and Health Research Institutes, Dublin Institute of Technology, Dublin, Ireland; <sup>4</sup>Institut de Neurociències & Department of Biochemistry and Molecular Biology, School of Medicine, Universitat Autònoma de Barcelona, Barcelona, Spain; <sup>5</sup>Department of Chemical and Environmental Engineering, University of Nottingham, UK

\*These authors contributed equally to this work.

**Corresponding author**

Correspondence to James Curtin (james.curtin@dit.ie).

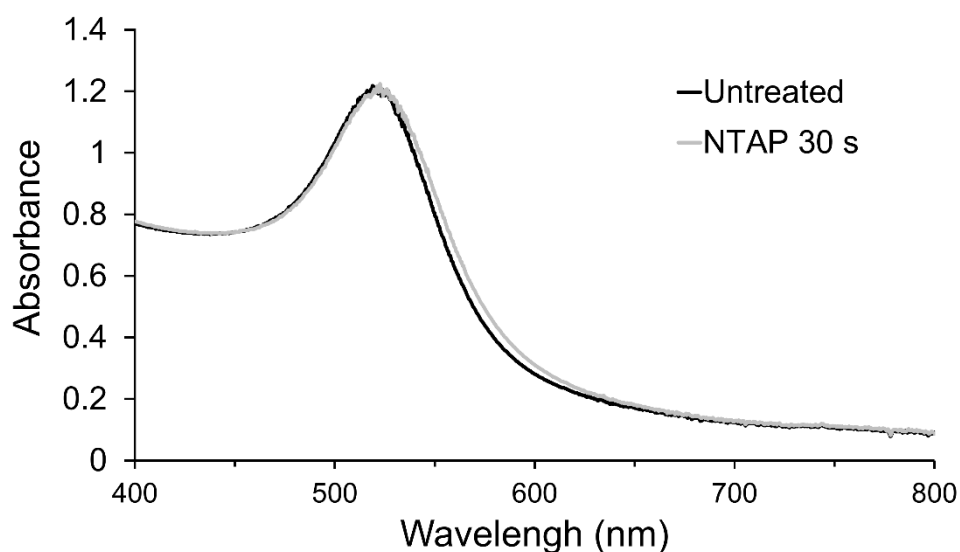

**Figure S1.** UV-vis absorption spectrum of 100 µg/ml AuNPs dispersed in water. The AuNPs solutions were treated with CAP at 75 kV for 30 s, or untreated.

| Raw dataset of the Alamar Blue assay |                       |     |     |     |     |                                |     |     |     |     |
|--------------------------------------|-----------------------|-----|-----|-----|-----|--------------------------------|-----|-----|-----|-----|
| AuNP Concentration                   | Treatment: AuNPs only |     |     |     |     | Treatment: AuNPs+CAP 30s,75 kV |     |     |     |     |
| 800 µg/ml                            | 223                   | 209 | 289 | 283 | 301 | 113                            | 86  | 79  | 81  | 103 |
| 400 µg/ml                            | 292                   | 287 | 312 | 321 | 336 | 175                            | 122 | 172 | 171 | 183 |
| 200 µg/ml                            | 307                   | 325 | 334 | 331 | 320 | 177                            | 140 | 219 | 206 | 219 |
| 100 µg/ml                            | 300                   | 336 | 337 | 336 | 344 | 164                            | 136 | 150 | 184 | 178 |
| 50 µg/ml                             | 335                   | 351 | 353 | 352 | 349 | 232                            | 210 | 206 | 207 | 238 |
| 25 µg/ml                             | 329                   | 346 | 352 | 352 | 346 | 182                            | 200 | 198 | 192 | 177 |
| 12.5 µg/ml                           | 358                   | 356 | 347 | 366 | 374 | 167                            | 192 | 210 | 186 | 200 |
| 6.75 µg/ml                           | 330                   | 356 | 363 | 365 | 379 | 204                            | 246 | 277 | 247 | 276 |
| 3.375 µg/ml                          | 338                   | 348 | 363 | 358 | 360 | 284                            | 299 | 269 | 292 | 280 |
| 0                                    | 335                   | 354 | 352 | 356 | 360 | 242                            | 280 | 354 | 292 | 276 |
| Negative control                     | 13                    | 14  | 13  | 14  | 13  |                                |     |     |     |     |

**Table S1.** Raw dataset of the Alamar Blue assay. U373MG cells were treated with different concentrations of AuNPs (0-800 µg/ml). After incubated for 48 h, cell viability was analysed using the Alamar Blue assay. The table presented the raw date produced by the Microplate Reader, Synergy HT (BioTek).
